# Supplementary material for: White-light emission triggered by pseudo Jahn–Teller distortion at the pressure-induced phase transition in Cs4PbBr6
Source: Royal Society of Chemistry journal article supplement (doi:10.1039/d4tc00036f), 2024-01-01
Supplement: d4tc00036f1.pdf [file d4tc00036f1.pdf]

## Supplementary Information

### **White-Light Emission Triggered by Pseudo Jahn-Teller Distortion at the Pressure-Induced Phase Transition in Cs<sub>4</sub>PbBr<sub>6</sub>**

Viktoriia Drushliak, Konrad J. Kapcia and Marek Szafranski\*

*Faculty of Physics, Adam Mickiewicz University, Uniwersytetu Poznańskiego 2, 61-614 Poznań,  
Poland*

\*Corresponding author e-mail: [masza@amu.edu.pl](mailto:masza@amu.edu.pl)

Table S1. Selected crystallographic and refinement data for the structures of Cs<sub>4</sub>PbBr<sub>6</sub>.

| Crystal formula                                                            | Cs <sub>4</sub> PbBr <sub>6</sub> |                                |                                |                                |                                |
|----------------------------------------------------------------------------|-----------------------------------|--------------------------------|--------------------------------|--------------------------------|--------------------------------|
| Color                                                                      | colorless                         |                                |                                |                                |                                |
| Pressure (GPa)                                                             | 0.0001                            | 1.25                           | 2.09                           | 2.9                            | 3.84                           |
| Crystal system                                                             | Trigonal                          |                                |                                | Orthorhombic                   | Tetragonal                     |
| Space group                                                                | $R\bar{3}c$                       |                                |                                | $Cmce$                         | $P4/mnc$                       |
| Z                                                                          | 6                                 |                                |                                | 4                              | 2                              |
| Crystal size (mm)                                                          | $0.2 \times 0.2 \times 0.2$       | $0.11 \times 0.07 \times 0.04$ | $0.11 \times 0.07 \times 0.04$ | $0.11 \times 0.07 \times 0.04$ | $0.11 \times 0.11 \times 0.05$ |
| $a$ (Å)                                                                    | 13.6949(2)                        | 13.2866(11)                    | 13.1280(13)                    | 13.202(4)                      | 8.8515(12)                     |
| $b$ (Å)                                                                    | 13.6949(2)                        | 13.2866(11)                    | 13.1280(13)                    | 12.76(4)                       | 8.8515(12)                     |
| $c$ (Å)                                                                    | 17.3030(3)                        | 16.921(2)                      | 16.780(3)                      | 9.4879(18)                     | 9.3867(13)                     |
| Volume (Å <sup>3</sup> )                                                   | 2810.43(9)                        | 2587.0(5)                      | 2504.5(6)                      | 1598(5)                        | 735.4(2)                       |
| $\rho$ (g cm <sup>-3</sup> )                                               | 4.319                             | 4.692                          | 4.846                          | 5.062                          | 5.502                          |
| $\mu$ (mm <sup>-1</sup> )                                                  | 29.423                            | 31.965                         | 33.017                         | 34.488                         | 37.479                         |
| No. of measured, independent and observed [ $I > 2\sigma(I)$ ] reflections | 7629, 897, 836                    | 4172, 407, 309                 | 3984, 393, 299                 | 3064, 294, 156                 | 3014, 272, 211                 |
| $R_{int}$                                                                  | 0.032                             | 0.052                          | 0.066                          | 0.204                          | 0.062                          |
| $R_1$ [ $I > 2\sigma(I)$ ], $R_1(all)$                                     | 0.022, 0.024                      | 0.036, 0.060                   | 0.046, 0.069                   | 0.097, 0.159                   | 0.044, 0.060                   |
| $wR_2$ [ $I > 2\sigma(I)$ ], $wR_2(all)$                                   | 0.057, 0.058                      | 0.060, 0.069                   | 0.088, 0.099                   | 0.257, 0.306                   | 0.101, 0.109                   |
| S                                                                          | 1.104                             | 1.165                          | 1.112                          | 1.090                          | 1.082                          |

Table S2. Comparison of the unit cell parameters of the colourless and yellow Cs<sub>4</sub>PbBr<sub>6</sub> at atmospheric pressure.

|                          | Colorless Cs <sub>4</sub> PbBr <sub>6</sub> | Yellow Cs <sub>4</sub> PbBr <sub>6</sub> |
|--------------------------|---------------------------------------------|------------------------------------------|
| Crystal system           | Trigonal<br><i>R</i> $\bar{3}c$<br>6        |                                          |
| Space group              |                                             |                                          |
| Z                        |                                             |                                          |
| Crystal size (mm)        | 0.2 × 0.2 × 0.2                             | 0.10 × 0.07 × 0.07                       |
| <i>a</i> (Å)             | 13.6949(2)                                  | 13.6776(6)                               |
| <i>b</i> (Å)             | 13.6949(2)                                  | 13.6776(6)                               |
| <i>c</i> (Å)             | 17.3030(3)                                  | 17.2585(8)                               |
| Volume (Å <sup>3</sup> ) | 2810.43(9)                                  | 2796.1(3)                                |

The thermal stability of Cs<sub>4</sub>PbBr<sub>6</sub> was verified by the thermogravimetric analysis (TGA) method using a TGA Q50 apparatus (TA Instruments) and by differential scanning calorimetry (DSC) with a Q2000 calorimeter (TA Instruments). TGA was performed on powdered crystals heated with a rate of 10 K min<sup>-1</sup> in a stream of gaseous nitrogen. TGA has shown that Cs<sub>4</sub>PbBr<sub>6</sub> is thermally stable up to about 800 K, where the onset of a decay was detected (Fig. S1a). The DSC cooling/heating runs were measured with the same rate of temperature changes in the range 100–500 K. Under ambient pressure, the trigonal phase of the crystal is preserved in a studied temperature range (Fig. S1b).

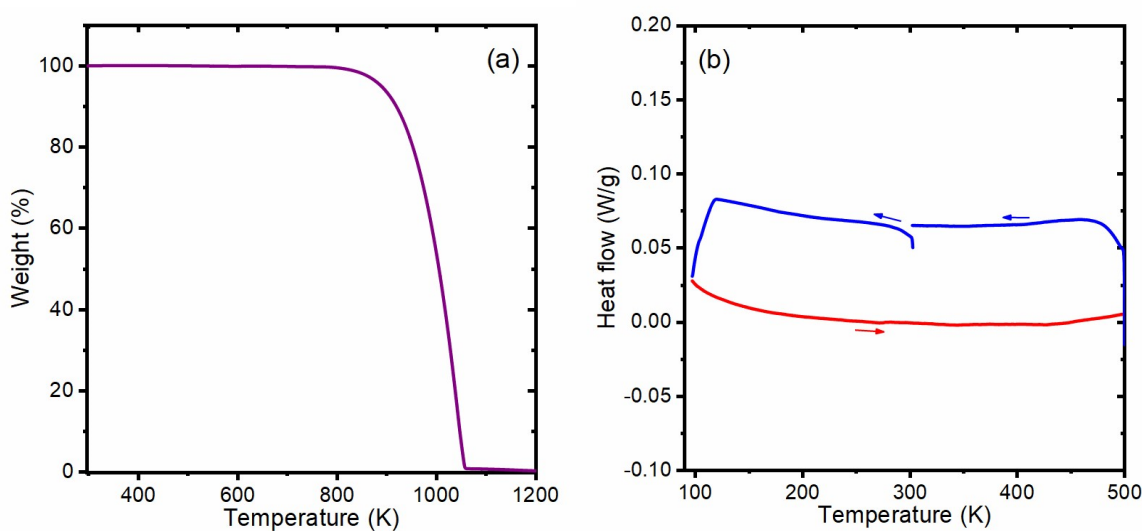

Fig. S1 TGA curve (a), and DSC runs (b) measured for powdered Cs<sub>4</sub>PbBr<sub>6</sub> at a temperature rare of 10 K/min.

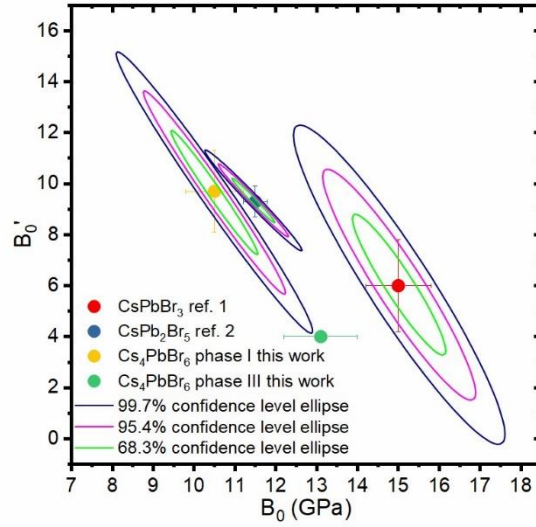

**Fig. S2** Values of  $B_0'$  plotted versus  $B_0$  for  $\text{Cs}_4\text{PbBr}_6$ ,  $\text{CsPb}_2\text{Br}_5$  and  $\text{CsPbBr}_3$ . The different confidence level ellipses are shown. For  $\text{Cs}_4\text{PbBr}_6$  in phase III the second-order Birch–Murnaghan equation of state was used.

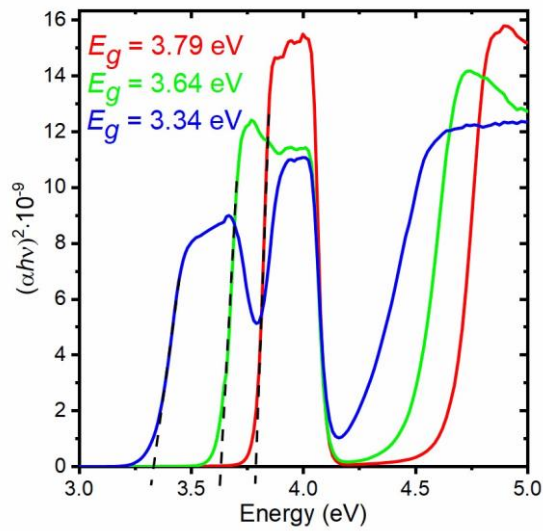

**Fig. S3** Tauc plots and energy gaps determined from the absorption spectra measured for the 1.7  $\mu\text{m}$  thick pure  $\text{Cs}_4\text{PbBr}_6$  single-crystal plate.

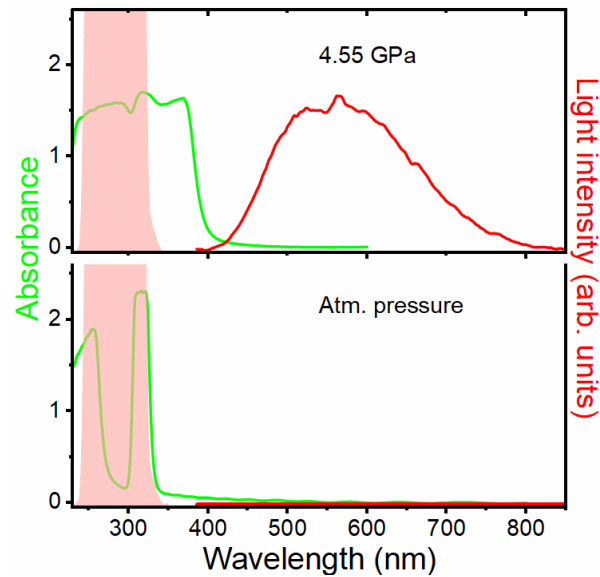

**Fig. S4** Comparison of the absorption and emission spectra of pure  $\text{Cs}_4\text{PbBr}_6$  at atmospheric pressure and 4.55 GPa. Light red colour area represents the excitation spectrum.

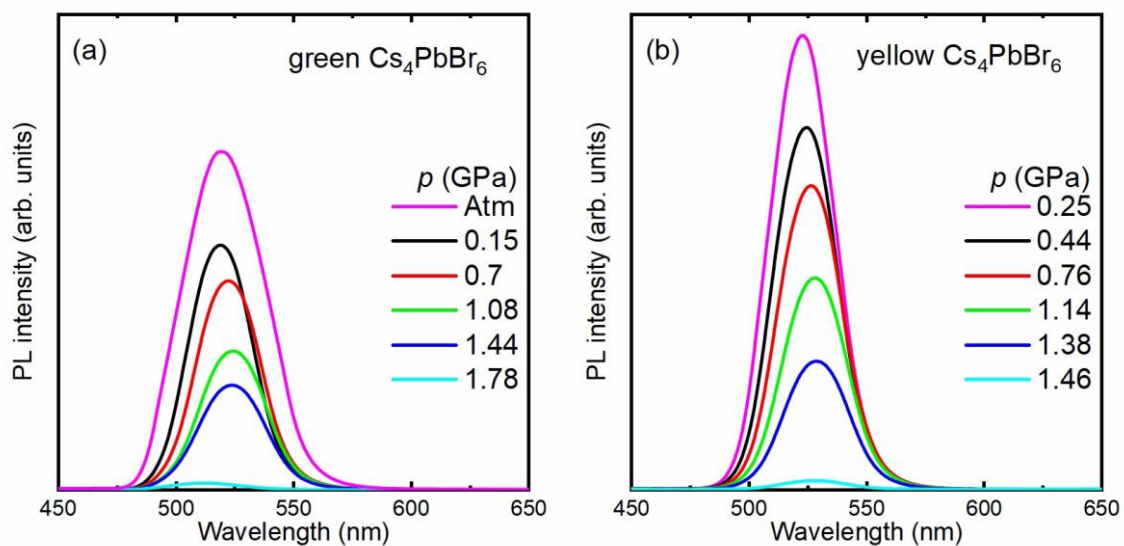

**Fig. S5** Pressure dependence of the PL spectra of green (a) and yellow (b)  $\text{Cs}_4\text{PbBr}_6$ .

In Fig. S5, we show the fluorescence spectra of compressed green and yellow  $\text{Cs}_4\text{PbBr}_6$  samples. With increasing pressure, the PL signal of both forms gradually redshifts and decreases, and finally suddenly disappears around 1.78 and 1.46 GPa, respectively, for the green and yellow crystals. This pressure where PL vanishes corresponds well to the phase transition in  $\text{CsPbBr}_3$  associated

with PL quenching. This indicates that the green emission of  $\text{Cs}_4\text{PbBr}_6$  originates in  $\text{CsPbBr}_3$  inclusions.

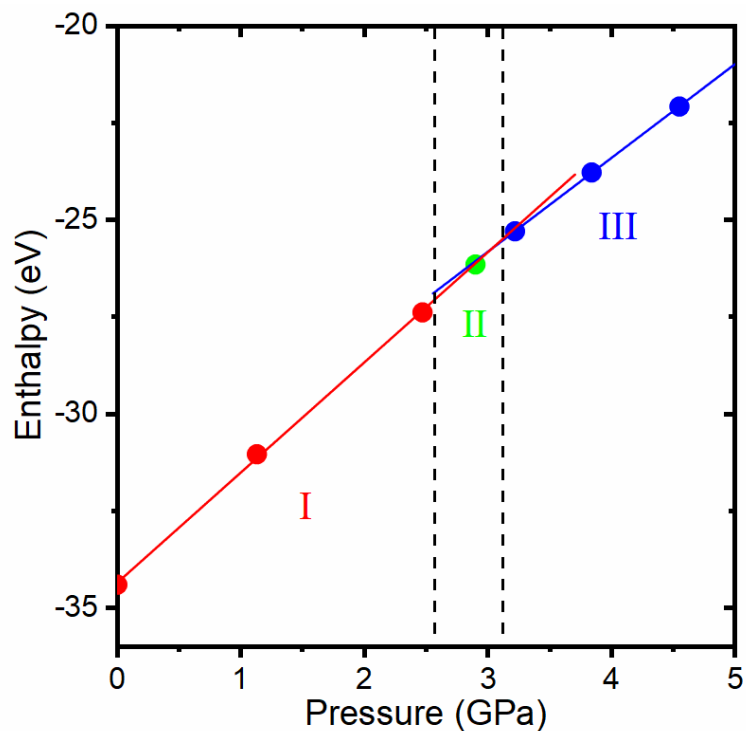

**Fig. S6.** Free enthalpy calculated for one formula unit as a function of pressure across the phases I, II and III. The solid lines correspond to the best linear fits of the calculated points in phase I (red) and III (blue).

## References

1. M. Szafranski, A. Katrusiak and K. Ståhl, *J Mater Chem A Mater*, 2021, **9**, 10769–10779.
2. V. Drushliak and M. Szafranski, *Inorg Chem*, 2022, **61**, 14389–14396.
